# Supplementary material for: High-dimensional single-cell phenotyping reveals extensive haploinsufficiency
Source: PubMed Central journal article supplement (PMC5955526; doi:10.1371/journal.pbio.2005130), 2018-05-16

444 traits

830 GOs

130 pPCs

346 gPCs

21 21  
pCVs gCVs

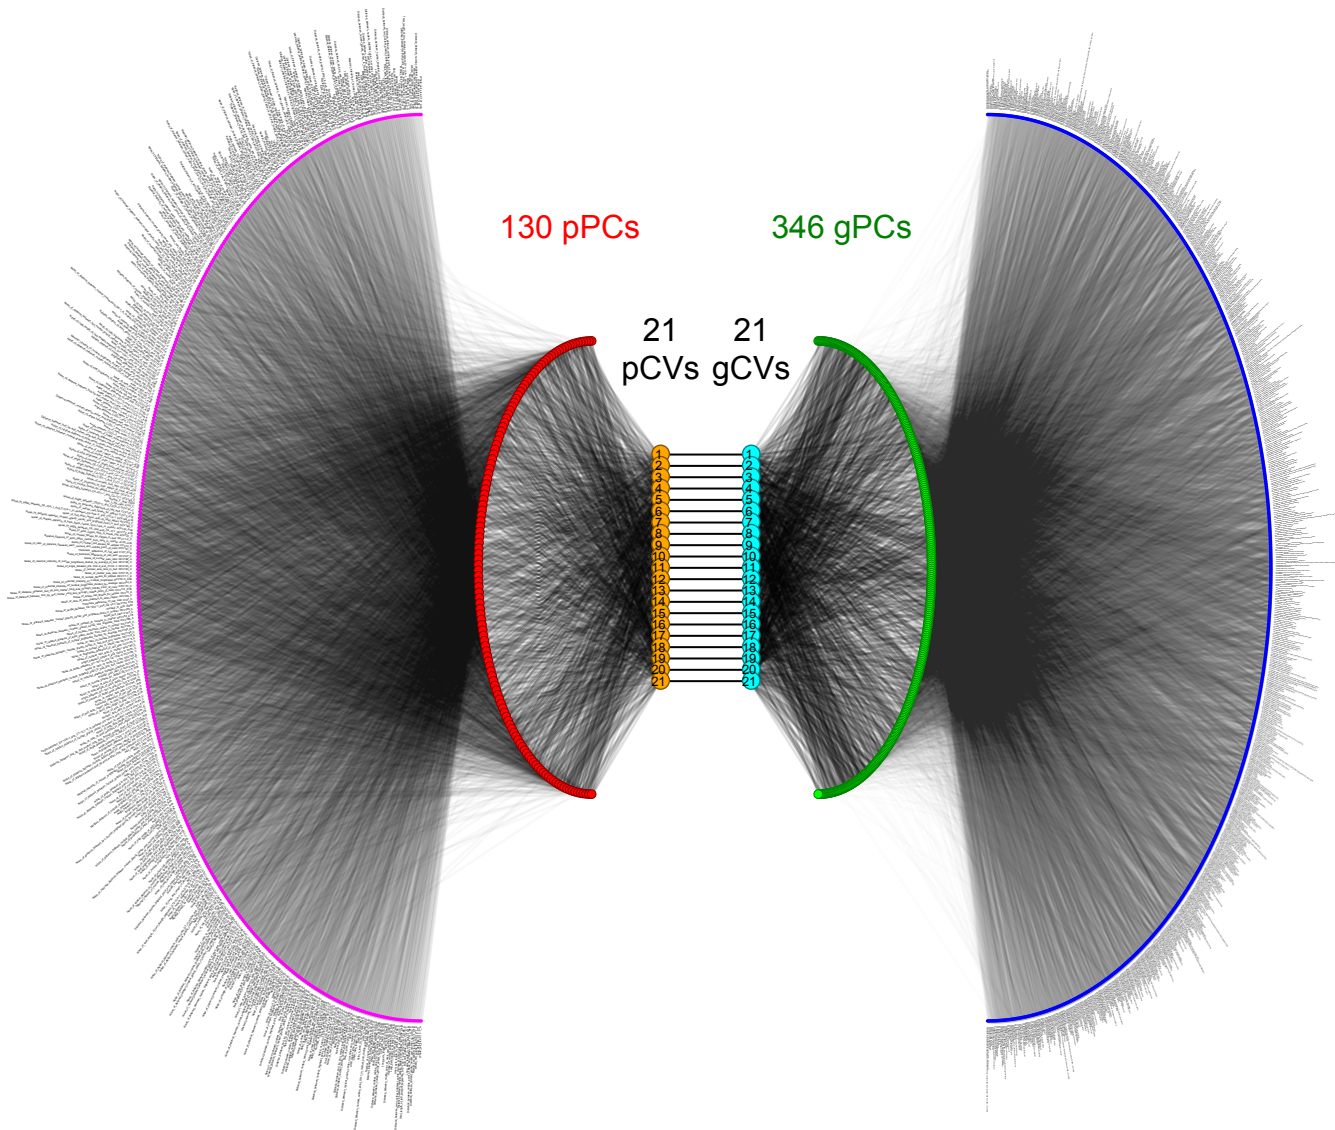

Supplement: pbio.2005130.s015.pdf [file pbio.2005130.s015.pdf]
