# Supplementary material for: High-dimensional single-cell phenotyping reveals extensive haploinsufficiency
Source: PubMed Central journal article supplement (PMC5955526; doi:10.1371/journal.pbio.2005130), 2018-05-16

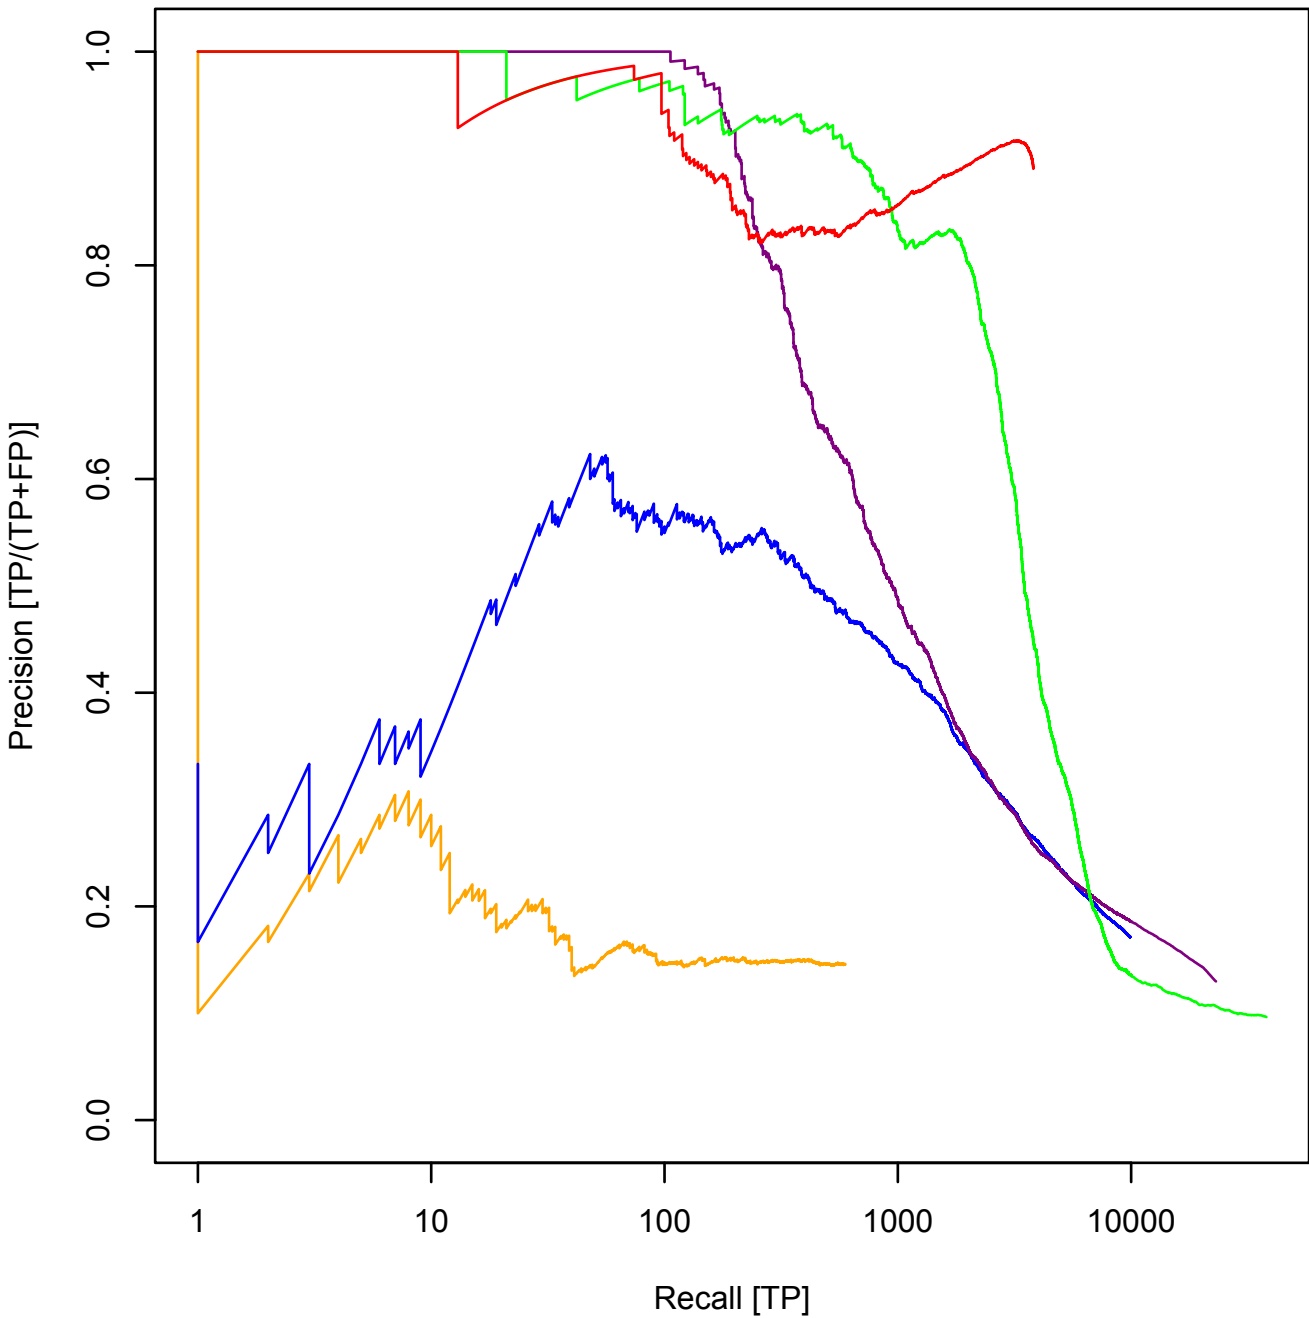

Supplement: pbio.2005130.s023.pdf [file pbio.2005130.s023.pdf]
