# Supplementary material for: High-dimensional single-cell phenotyping reveals extensive haploinsufficiency
Source: PLoS Biol. 2018 May 16;16(5):e2005130. doi: 10.1371/journal.pbio.2005130 (PMC5955526; doi:10.1371/journal.pbio.2005130)
Supplement: S6 Data — (XLSX) [file pbio.2005130.s029.xlsx]

## Sheet: trait contribution
Number of employed traits	1112 heterozygotes					114 replicates of wild-type
	mean	noise	ratio	noise + mean	all	mean	noise	ratio	noise + mean	all
1	0.00825989	0.006631	0.0073714	0.00769694	0.00756175	7.01754e-05	0.000207602	0	0.000128655	0.000131579
2	0.0161475	0.0138504	0.0139697	0.0146643	0.014804	0.000204678	0.000406433	0	0.000292398	0.000222222
3	0.0234574	0.0197509	0.0201421	0.0219946	0.0219023	0.00022807	0.000587719	0	0.000415205	0.000327485
4	0.0305345	0.0255081	0.0255905	0.0287236	0.0283201	0.000274854	0.00077193	0	0.000596491	0.0005
5	0.0368693	0.0313432	0.0310312	0.0351685	0.0350072	0.000426901	0.00101754	0	0.000733918	0.000628655
6	0.0430971	0.0379568	0.0350582	0.041381	0.0417476	0.00045614	0.00120175	0	0.000856725	0.000748538
7	0.0488234	0.0432044	0.039896	0.0471589	0.0479218	0.000567251	0.00143567	0	0.00103509	0.000894737
8	0.0535342	0.0493927	0.044027	0.0528288	0.0527362	0.000649123	0.00158772	0	0.00104971	0.00104094
9	0.060185	0.0535803	0.0470821	0.0591613	0.0585624	0.000783626	0.00166667	0	0.00124269	0.00104971
10	0.064708	0.0597548	0.0505309	0.0639263	0.064461	0.000894737	0.00196199	0	0.00138012	0.00130994
11	0.0695279	0.0643411	0.0533621	0.0693864	0.0690462	0.000912281	0.00209942	0	0.00152632	0.00131579
12	0.0742527	0.0696091	0.056318	0.0745348	0.0740546	0.0010117	0.00234795	0	0.00165205	0.00141813
13	0.0788582	0.0738906	0.0595465	0.0792038	0.079259	0.00108187	0.00261988	0	0.00180702	0.00149415
14	0.0835722	0.0791409	0.0619287	0.084896	0.0836748	0.00112281	0.0027193	0	0.00194444	0.00180409
15	0.086967	0.0838729	0.0643279	0.0889976	0.0885246	0.00120468	0.00285088	0	0.00192105	0.00180702
16	0.0903648	0.0886529	0.06672	0.0936385	0.093366	0.00130994	0.00307018	0	0.00218421	0.00196491
17	0.0940531	0.0930761	0.0688567	0.0988294	0.0973558	0.00136257	0.00330117	0	0.00234211	0.00187135
18	0.0979499	0.0972662	0.0713633	0.103227	0.10249	0.00140351	0.00363158	0	0.00251754	0.00225731
19	0.102065	0.102376	0.0731103	0.106731	0.106565	0.00128655	0.00377778	0	0.0026462	0.00219298
20	0.105143	0.105463	0.0751199	0.111808	0.109431	0.00147368	0.00397953	0	0.00270175	0.00212573
21	0.108876	0.110496	0.0769047	0.114911	0.115184	0.00159064	0.00388304	0	0.00295906	0.0024883
22	0.112484	0.115458	0.0787203	0.119712	0.118631	0.00178947	0.0044152	0	0.0030848	0.00281871
23	0.114609	0.118202	0.0801148	0.123622	0.12264	0.00169591	0.00453216	0	0.00309942	0.00262281
24	0.118071	0.123379	0.0822296	0.127214	0.126201	0.00192398	0.00450585	0	0.00333041	0.00269883
25	0.121001	0.127393	0.0837581	0.131401	0.129859	0.00180702	0.00481579	0	0.00352047	0.00309942
26	0.123243	0.129635	0.0851229	0.135215	0.133327	0.00219883	0.00508772	0	0.0036462	0.00314327
27	0.127153	0.135281	0.0868336	0.138807	0.136425	0.00197661	0.00525439	0	0.00387427	0.00330702
28	0.129163	0.138447	0.0875042	0.142222	0.140168	0.00243275	0.0050614	0	0.00383626	0.00343275
29	0.132215	0.14239	0.0893765	0.145716	0.144437	0.00236257	0.00561696	0	0.00382164	0.00359357
30	0.134539	0.146553	0.0908582	0.149534	0.147539	0.00239766	0.00582164	0	0.00426023	0.00357895
31	0.137885	0.149214	0.0920591	0.153526	0.151321	0.00253801	0.00576901	0	0.00421053	0.00350585
32	0.139264	0.153609	0.0933447	0.155618	0.153816	0.00244444	0.00626608	0	0.00437719	0.00372222
33	0.142058	0.157238	0.094982	0.159302	0.157995	0.00254386	0.00646491	0	0.00449415	0.00406433
34	0.145247	0.161003	0.0959685	0.162885	0.159843	0.00259649	0.00676901	0	0.00490351	0.00448538
35	0.146419	0.163384	0.0971133	0.165791	0.163383	0.00285965	0.00698246	0	0.00481287	0.00427193
36	0.149436	0.167065	0.0986775	0.168366	0.166975	0.003	0.00715205	0	0.00500877	0.00422807
37	0.152285	0.170153	0.0995689	0.171908	0.171106	0.00297661	0.00698246	0	0.00496784	0.00475439
38	0.154027	0.173754	0.100786	0.17481	0.172957	0.00316374	0.00738304	0	0.00517836	0.00463743
39	0.156767	0.177513	0.101874	0.178121	0.176106	0.00316959	0.00752924	0	0.00533918	0.00463158
40	0.158355	0.180598	0.102807	0.181552	0.17953	0.00302339	0.00783918	0	0.00559357	0.00488012
41	0.160775	0.18424	0.10406	0.184247	0.181328	0.00320468	0.00775731	0	0.00583626	0.00502924
42	0.162432	0.187205	0.105013	0.186765	0.185256	0.0034386	0.00826316	0	0.00579825	0.00484795
43	0.163645	0.190043	0.105988	0.189288	0.188132	0.0034269	0.00841813	0	0.00612865	0.00513158
44	0.166493	0.193864	0.106987	0.192876	0.190176	0.00350877	0.00844152	0	0.00591228	0.00512281
45	0.169038	0.19694	0.108127	0.194922	0.192582	0.0035848	0.0085731	0	0.00621345	0.0055848
46	0.171124	0.198424	0.109075	0.199015	0.196288	0.00369591	0.00892982	0	0.00595614	0.00542982
47	0.172356	0.202172	0.110093	0.201563	0.198195	0.00400585	0.00905556	0	0.00633626	0.00567836
48	0.174516	0.205049	0.111009	0.204183	0.201565	0.00383626	0.00923392	0	0.00666959	0.00590643
49	0.175643	0.208707	0.111679	0.205675	0.203649	0.00398246	0.0095614	0	0.00664035	0.00613158
50	0.17826	0.211339	0.112759	0.208653	0.206663	0.00391813	0.00961988	0	0.0068655	0.00587719
51	0.179934	0.212761	0.113534	0.211397	0.208765	0.00407602	0.00973099	0	0.00695906	0.00611404
52	0.181824	0.216494	0.11439	0.214988	0.210996	0.00391813	0.00972807	0	0.00701754	0.00629532
53	0.183184	0.219148	0.115225	0.216222	0.21252	0.00407018	0.00992398	0	0.00692105	0.00649123
54	0.185034	0.223222	0.116112	0.219396	0.216781	0.00426316	0.0102749	0	0.00766082	0.00648246
55	0.186464	0.226052	0.116838	0.221758	0.218769	0.00423977	0.0104591	0	0.0075731	0.00671053
56	0.188379	0.228605	0.117633	0.224397	0.221015	0.00434503	0.0105409	0	0.00788304	0.00669591
57	0.190858	0.230405	0.118396	0.226364	0.223449	0.00469006	0.0108304	0	0.00760234	0.00699708
58	0.191562	0.233514	0.119167	0.228288	0.226206	0.0044152	0.010883	0	0.00811404	0.00710526
59	0.193319	0.236081	0.119886	0.231747	0.228176	0.00444444	0.0113743	0	0.00811988	0.00700585
60	0.194597	0.238448	0.120694	0.233718	0.229733	0.00480702	0.0112456	0	0.00797368	0.00730702
61	0.196184	0.24227	0.121403	0.236153	0.232222	0.00493567	0.0113596	0	0.00823099	0.00719006
62	0.197001	0.243687		0.237977	0.233116	0.00484795	0.0118158		0.00829532	0.00740643
63	0.199503	0.246087		0.240642	0.236321	0.00490058	0.0118684		0.00840351	0.00754094
64	0.20053	0.249512		0.242626	0.238773	0.00514035	0.0121228		0.00862281	0.00778947
65	0.202156	0.251323		0.245182	0.24152	0.00510526	0.0123801		0.00871637	0.00785088
66	0.203411	0.253924		0.24687	0.244031	0.00531579	0.0121901		0.00892982	0.00783918
67	0.205185	0.256516		0.249802	0.245404	0.00515205	0.0124883		0.00883918	0.00795906
68	0.206317	0.257888		0.251944	0.246802	0.0055848	0.0126637		0.00912865	0.00811404
69	0.207999	0.261034		0.253685	0.249565	0.00538012	0.0126754		0.00929825	0.00821345
70	0.20915	0.26304		0.255454	0.252213	0.0057076	0.0131667		0.00946199	0.00838012
71	0.211457	0.265774		0.25818	0.254073	0.00556725	0.0132339		0.00968421	0.00828947
72	0.21212	0.267508		0.259295	0.255763	0.0055614	0.0136111		0.00968713	0.00872222
73	0.213795	0.270029		0.261667	0.257914	0.00571345	0.013386		0.00995614	0.00890936
74	0.214784	0.272694		0.264682	0.259941	0.00569006	0.0137076		0.00981579	0.00863158
75	0.216282	0.27471		0.267016	0.261254	0.00597661	0.0137573		0.00995906	0.00922222
76	0.21772	0.276129		0.267422	0.263469	0.00619883	0.0140292		0.0102339	0.00923684
77	0.219038	0.279198		0.269418	0.265332	0.00595906	0.0142515		0.0103743	0.00940643
78	0.219678	0.281543		0.27236	0.267461	0.00654971	0.0144942		0.0103889	0.00938304
79	0.221365	0.28328		0.273821	0.269096	0.00639766	0.0147661		0.0108158	0.00940936
80	0.222707	0.286445		0.275481	0.271403	0.00608187	0.0149064		0.010924	0.00952924
81	0.223906	0.288112		0.278214	0.272856	0.00639181	0.0151111		0.0105877	0.00957602
82	0.224145	0.290279		0.279713	0.27503	0.00652047	0.0151111		0.0111053	0.0096462
83	0.225881	0.292135		0.281334	0.276263	0.00653801	0.015152		0.0111667	0.00976608
84	0.226973	0.295129		0.283112	0.278837	0.00691813	0.0155994		0.0112105	0.0100936
85	0.228214	0.296498		0.285333	0.280153	0.00694152	0.0157836		0.0113626	0.0102193
86	0.229656	0.297511		0.287178	0.281727	0.00694737	0.0161345		0.0115117	0.0101959
87	0.230827	0.300838		0.289191	0.284115	0.00678363	0.015845		0.0118918	0.0103626
88	0.231675	0.303438		0.290656	0.285298	0.00690643	0.0161813		0.0117573	0.0103626
89	0.232984	0.304233		0.291975	0.286924	0.00714035	0.016307		0.0121316	0.0109912
90	0.233637	0.306551		0.294327	0.287876	0.00709357	0.0163889		0.0121579	0.0108099
91	0.234698	0.308982		0.296292	0.290416	0.00735088	0.0165819		0.0125702	0.0111023
92	0.236011	0.310612		0.297838	0.292778	0.00730409	0.016883		0.0123918	0.0112602
93	0.237498	0.311965		0.299089	0.294038	0.00722807	0.0170556		0.0124912	0.0112339
94	0.238387	0.314028		0.301278	0.295867	0.00732164	0.016962		0.0126462	0.0109327
95	0.238902	0.316846		0.303066	0.297142	0.0077193	0.0173772		0.0130789	0.0114152
96	0.241	0.318085		0.303498	0.299409	0.00774854	0.0173918		0.0129064	0.0115263
97	0.241842	0.319874		0.30626	0.300665	0.0074386	0.0174386		0.0130936	0.0113889
98	0.242174	0.322516		0.307719	0.30214	0.00749708	0.0179561		0.0131754	0.0116053
99	0.24378	0.32382		0.310138	0.303568	0.00760819	0.017886		0.0133304	0.0116404
100	0.24504	0.325148		0.311737	0.305815	0.00804678	0.0183041		0.0136199	0.0121199
101	0.24561	0.328079		0.313276	0.30706	0.00796491	0.0184415		0.013652	0.0120556
102	0.247083	0.329169		0.315055	0.3084	0.00823977	0.0185673		0.0138158	0.0123596
103	0.247542	0.331135		0.316371	0.310003	0.00823977	0.0184561		0.0137485	0.0120058
104	0.248353	0.332519		0.317794	0.311915	0.00812865	0.0186608		0.0141667	0.0123158
105	0.249296	0.3343		0.319487	0.313416	0.00833918	0.0189152		0.0141696	0.0126959
106	0.25042	0.336463		0.320991	0.315242	0.00823392	0.0189211		0.014231	0.0125673
107	0.252064	0.337737		0.322344	0.316316	0.00838596	0.0192632		0.014576	0.0127485
108	0.253031	0.339379		0.323807	0.318414	0.00852047	0.0192749		0.0142573	0.0129474
109	0.25325	0.341955		0.32521	0.31996	0.0085848	0.0196871		0.015114	0.0129591
110	0.254528	0.343238		0.326728	0.321251	0.00861404	0.0197076		0.0148801	0.013152
111	0.255096	0.344137		0.328154	0.321834	0.00880117	0.0200175		0.014924	0.0132076
112	0.256566	0.346455		0.329778	0.324092	0.00878363	0.0200088		0.0149327	0.0134211
113	0.257046	0.347852		0.331834	0.325502	0.00902339	0.0202018		0.0149327	0.0132661
114	0.257568	0.349718		0.332783	0.326531	0.00916959	0.0202368		0.0150205	0.0134035
115	0.259051	0.35118		0.33497	0.327656	0.00889474	0.0204737		0.0151257	0.0133889
116	0.259647	0.352863		0.336446	0.330146	0.00922222	0.0204298		0.0158655	0.0138421
117	0.26108	0.354687		0.337062	0.331306	0.00922807	0.0208509		0.0157602	0.0137485
118	0.261754	0.356189		0.338987	0.332017	0.00968421	0.0212427		0.0158509	0.0143187
119	0.262797	0.358247		0.339793	0.33336	0.00961988	0.021038		0.0158713	0.0133713
120	0.263436	0.359606		0.341877	0.335441	0.00966082	0.0214708		0.0160468	0.0144532
121	0.264015	0.360788		0.342668	0.336584	0.00967251	0.0215819		0.016462	0.0140819
122	0.265222	0.362776		0.344183	0.338221	0.00987719	0.0215088		0.0160614	0.0143012
123	0.265539	0.364482		0.345593	0.339516	0.00967251	0.0220088		0.0163684	0.0143246
124	0.266642	0.366216		0.34778	0.340387	0.0100643	0.0219649		0.0165702	0.0148509
125	0.267421	0.36724		0.348966	0.343167	0.00987719	0.0223596		0.0167398	0.0146813
126	0.268791	0.368025		0.349177	0.342553	0.00992398	0.0219942		0.0165848	0.0147719
127	0.269337	0.37106		0.350904	0.344237	0.0102573	0.022117		0.0168772	0.0147865
128	0.269623	0.37199		0.351939	0.34629	0.0103801	0.0222836		0.016924	0.0150029
129	0.270514	0.37303		0.353873	0.347403	0.0105029	0.0227865		0.0174561	0.0150965
130	0.271543	0.374501		0.355583	0.348647	0.0104211	0.0226813		0.0175088	0.0152602
131	0.272434	0.376505		0.356864	0.349754	0.0104912	0.0229825		0.0175556	0.0153041
132	0.272998	0.37758		0.357672	0.350897	0.0105439	0.023155		0.0181637	0.0155848
133	0.274089	0.378924		0.359535	0.352626	0.0108304	0.0232076		0.0173772	0.0156287
134	0.274853	0.379619		0.360859	0.353506	0.0106842	0.0236111		0.0177222	0.015576
135	0.27524	0.382081		0.361997	0.355525	0.0107719	0.0234474		0.0178947	0.0157456
136	0.276493	0.383067		0.363612	0.355527	0.0106374	0.0236023		0.0178099	0.0158596
137	0.277184	0.384512		0.364663	0.357432	0.0109825	0.024152		0.0183246	0.0161111
138	0.277686	0.386051		0.365576	0.358774	0.0109649	0.0242749		0.0186637	0.0161462
139	0.278582	0.387782		0.367199	0.359569	0.011193	0.0243187		0.0188275	0.0163041
140	0.279186	0.388805		0.367993	0.361904	0.0112222	0.0242953		0.0187632	0.0160497
141	0.280083	0.390646		0.369544	0.36205	0.0113216	0.0245263		0.0191462	0.0165351
142	0.280561	0.391273		0.370144	0.363562	0.0108596	0.0245673		0.0188947	0.0168567
143	0.281473	0.39275		0.372362	0.364587	0.0114444	0.0244503		0.0191082	0.0171433
144	0.282358	0.39456		0.373539	0.365549	0.0113626	0.0250877		0.0193012	0.0169035
145	0.282577	0.395477		0.374567	0.367331	0.0115146	0.0249123		0.0195439	0.0172632
146	0.284049	0.396522		0.375402	0.368713	0.0116316	0.0251725		0.0193947	0.0166608
147	0.284322	0.39844		0.376527	0.369323	0.0118889	0.0253333		0.0196988	0.0169035
148	0.284985	0.399903		0.377943	0.371261	0.0119415	0.0253392		0.0195643	0.0174503
149	0.286051	0.400842		0.379432	0.371985	0.0117193	0.0258363		0.0196871	0.0175468
150	0.286823	0.402463		0.379379	0.373042	0.0117135	0.0255789		0.0201462	0.0175906
151	0.287657	0.404096		0.38184	0.373501	0.0120994	0.0260673		0.0197778	0.017307
152	0.28796	0.404778		0.382892	0.375494	0.0121345	0.0260205		0.0202719	0.0181608
153	0.288633	0.405954		0.383611	0.376359	0.0119123	0.0264708		0.0203743	0.0181257
154	0.289601	0.407165		0.384612	0.378318	0.0120058	0.0266053		0.0203713	0.0182807
155	0.290406	0.409105		0.386193	0.378542	0.0123392	0.0266696		0.0206784	0.0181404
156	0.29055	0.410118		0.386897	0.379737	0.0124854	0.0269444		0.0209386	0.0181988
157	0.29139	0.411515		0.388365	0.381597	0.0122807	0.0268538		0.0209649	0.0184064
158	0.291903	0.41274		0.389894	0.382109	0.012462	0.0267135		0.0207661	0.0184708
159	0.292489	0.413764		0.39104	0.383468	0.0125906	0.0268304		0.0209357	0.0188509
160	0.293399	0.414518		0.391215	0.384371	0.0127427	0.0271053		0.0208421	0.0187456
161	0.294146	0.416161		0.393896	0.38512	0.0125088	0.0274649		0.0212251	0.0190029
162	0.29484	0.41707		0.393587	0.386884	0.0130468	0.0275263		0.0219708	0.0188684
163	0.295531	0.418879		0.394812	0.386985	0.0130409	0.027614		0.0215175	0.0185
164	0.296352	0.419661		0.396054	0.388655	0.0132515	0.0277895		0.0216316	0.0192427
165	0.297032	0.420803		0.397814	0.389348	0.0133626	0.027845		0.0218567	0.0192836
166	0.297589	0.422197		0.398251	0.390148	0.0132222	0.0279474		0.0222368	0.0195
167	0.298323	0.423274		0.399612	0.391591	0.0134912	0.0282339		0.0224269	0.0197544
168	0.298524	0.423962		0.400467	0.392731	0.0134854	0.0283713		0.0224415	0.0196404
169	0.299301	0.426131		0.402049	0.393309	0.013538	0.0283918		0.0222427	0.0196374
170	0.300163	0.426495		0.402502	0.395174	0.0134152	0.0286345		0.022386	0.0199152
171	0.300503	0.427648		0.403484	0.39571	0.0134912	0.0288889		0.0226404	0.0200614
172	0.301439	0.429104		0.404862	0.396725	0.0137778	0.0287398		0.0227339	0.0199123
173	0.301909	0.430052		0.405481	0.397471	0.013731	0.0290877		0.0227661	0.0201082
174	0.302545	0.431422		0.406992	0.398674	0.0139942	0.0291667		0.022962	0.0203743
175	0.302869	0.432656		0.407738	0.400833	0.0139181	0.029424		0.0228275	0.0205731
176	0.303728	0.433846		0.409303	0.40072	0.0139474	0.0296345		0.0232573	0.0205965
177	0.304389	0.434564		0.410335	0.401811	0.0140819	0.0295497		0.0236696	0.0208977
178	0.304836	0.43589		0.410508	0.403257	0.0141228	0.0297778		0.0230994	0.0209854
179	0.305496	0.436569		0.412258	0.403966	0.0142047	0.0296988		0.0235702	0.020769
180	0.306274	0.437478		0.412927	0.404806	0.0143333	0.0298392		0.0239795	0.0209327
181	0.306814	0.439043		0.413525	0.406221	0.0144327	0.029962		0.0239795	0.0208538
182	0.307382	0.439996		0.415027	0.406609	0.0144912	0.0300848		0.0238363	0.0212924
183	0.307817	0.441122		0.416377	0.408464	0.0145789	0.0304357		0.0237193	0.0208158
184	0.308341	0.442371		0.416841	0.408597	0.0146023	0.0304825		0.0241579	0.021386
185	0.30907	0.443321		0.417314	0.410656	0.014924	0.0307515		0.0246462	0.0212778
186	0.309897	0.444574		0.419446	0.410504	0.0147076	0.0306754		0.0241023	0.0212076
187	0.310036	0.445703		0.419672	0.412113	0.0147661	0.030962		0.0246345	0.0217339
188	0.310727	0.446505		0.420819	0.412756	0.0148304	0.0310585		0.0245263	0.0222807
189	0.31143	0.447433		0.42195	0.413924	0.0151754	0.0313626		0.0251374	0.021652
190	0.311912	0.448941		0.423285	0.414782	0.0151053	0.0313567		0.024807	0.0219795
191	0.312782	0.450122		0.424546	0.415287	0.0152807	0.0313684		0.0252836	0.0222982
192	0.313059	0.450795		0.423804	0.416179	0.0153099	0.0315526		0.0256316	0.0223918
193	0.313768	0.451942		0.426085	0.417212	0.0154912	0.0318216		0.0252398	0.0225731
194	0.314398	0.452826		0.426159	0.418806	0.0155614	0.0319912		0.0256667	0.0225614
195	0.314955	0.453957		0.427566	0.418602	0.0155965	0.0320234		0.0250673	0.0228216
196	0.315516	0.455325		0.428316	0.419771	0.0157251	0.0320175		0.0255351	0.0227047
197	0.315957	0.456279		0.429822	0.421193	0.015848	0.0321374		0.0255029	0.0225819
198	0.316587	0.457062		0.430354	0.421406	0.015731	0.0323129		0.0255117	0.0230439
199	0.317156	0.458193		0.431531	0.423816	0.0158538	0.0324181		0.0260322	0.0228918
200	0.317612	0.459132		0.432499	0.423617	0.0160117	0.0327281		0.0259269	0.0229269
201	0.31828	0.460286		0.432874	0.424911	0.0160117	0.0329298		0.0261667	0.0232924
202	0.318829	0.46101		0.434148	0.426215	0.0157953	0.0328304		0.0264211	0.0234854
203	0.319328	0.462165		0.434621	0.427394	0.0162047	0.032883		0.0265088	0.0232661
204	0.319829	0.463218		0.436161	0.427127	0.0163041	0.0330906		0.0265351	0.0235965
205	0.320322	0.464274		0.436573	0.429097	0.0163509	0.0331345		0.0268363	0.0235614
206	0.32089	0.464953		0.437269	0.429284	0.0163918	0.0333889		0.0269357	0.0237398
207	0.321517	0.466001		0.438978	0.430711	0.0165906	0.0336053		0.0266579	0.023962
208	0.321953	0.467003		0.439767	0.430642	0.0165906	0.0337602		0.0275497	0.0238392
209	0.322502	0.46788		0.440208	0.431878	0.0166257	0.0336842		0.027345	0.0246053
210	0.323022	0.468848		0.440615	0.432682	0.0167836	0.0339532		0.0268889	0.0241667
211	0.323535	0.470154		0.441949	0.433159	0.0167661	0.0340058		0.0278158	0.0243772
212	0.32415	0.470701		0.442524	0.434661	0.0169591	0.0340409		0.0275146	0.0243947
213	0.324689	0.471824		0.443751	0.435033	0.016924	0.034269		0.0275263	0.0241959
214	0.3252	0.472674		0.44492	0.436273	0.0170702	0.0344327		0.0279532	0.0246433
215	0.325665	0.473796		0.44574	0.437424	0.0169942	0.0344971		0.0278655	0.0249123
216	0.326186	0.474615		0.446149	0.437977	0.0172105	0.034617		0.0281725	0.0252719
217	0.326766	0.475567		0.448143	0.4386	0.0173158	0.0348187		0.027886	0.0247544
218	0.327156	0.476536		0.447186	0.439749	0.0174269	0.0348655		0.0289561	0.024883
219	0.327775	0.477493		0.448425	0.440165	0.0174327	0.0349503		0.0286316	0.0252661
220	0.328237	0.478417		0.450186	0.440263	0.0175439	0.0350877		0.028538	0.0251082
221				0.450076	0.442162				0.0283509	0.0254474
222				0.451579	0.443077				0.0289708	0.025424
223				0.452341	0.44313				0.0289386	0.025807
224				0.452701	0.444427				0.0284942	0.0258889
225				0.453531	0.445398				0.0290029	0.0257398
226				0.455345	0.445857				0.0291111	0.0261082
227				0.455078	0.446719				0.0295877	0.0258041
228				0.456955	0.447753				0.0299825	0.0270409
229				0.456679	0.448247				0.029886	0.0259942
230				0.457673	0.449157				0.029655	0.0261462
231				0.458475	0.45014				0.0294591	0.0266199
232				0.459414	0.450503				0.0298216	0.0267251
233				0.460016	0.451105				0.0299561	0.0266287
234				0.46056	0.452671				0.030038	0.0268421
235				0.461602	0.453139				0.030652	0.026462
236				0.46201	0.453685				0.0304883	0.0268363
237				0.463847	0.454584				0.0307573	0.027117
238				0.463606	0.455095				0.0305263	0.0271462
239				0.464675	0.456198				0.0308713	0.026924
240				0.465396	0.457025				0.0312485	0.0274298
241				0.466695	0.457485				0.0308889	0.0275877
242				0.466853	0.458406				0.0316871	0.0276053
243				0.467797	0.459556				0.0311901	0.0279386
244				0.468596	0.460627				0.0310848	0.0273977
245				0.46946	0.460274				0.0312573	0.0281667
246				0.46997	0.461703				0.0312339	0.0281696
247				0.470775	0.462361				0.0317982	0.0280234
248				0.472218	0.463168				0.0316462	0.0281959
249				0.472808	0.463136				0.0325117	0.0285877
250				0.473057	0.464826				0.0324298	0.028386
251				0.474012	0.464489				0.0320117	0.0283187
252				0.474555	0.46584				0.0323129	0.0284386
253				0.475537	0.466577				0.0325848	0.0288655
254				0.476117	0.466931				0.0323392	0.0286433
255				0.477176	0.468409				0.0326784	0.0289708
256				0.477606	0.468752				0.0324971	0.0292661
257				0.478521	0.469921				0.0329883	0.0289035
258				0.479319	0.469823				0.0328567	0.0292018
259				0.479421	0.470803				0.0332865	0.029424
260				0.48038	0.471341				0.0330409	0.0293918
261				0.480924	0.472291				0.0329386	0.0297427
262				0.482119	0.473137				0.0336491	0.029924
263				0.482682	0.473966				0.0333596	0.0295322
264				0.483743	0.474303				0.0330058	0.0299415
265				0.483891	0.474785				0.0339532	0.0300468
266				0.484698	0.475513				0.0339357	0.0307281
267				0.485882	0.476638				0.0339357	0.0301988
268				0.48574	0.477454				0.0341257	0.0300088
269				0.486719	0.478336				0.0341754	0.0301696
270				0.48799	0.478035				0.0341871	0.0309327
271				0.488028	0.479375				0.0345848	0.0304006
272				0.489224	0.479774				0.0347047	0.0307427
273				0.489158	0.480628				0.0347105	0.0308099
274				0.490338	0.480713				0.0347368	0.0314181
275				0.490594	0.482091				0.0351491	0.0310439
276				0.491223	0.48259				0.0351433	0.0309649
277				0.49246	0.484045				0.0349444	0.031386
278				0.492769	0.484355				0.0355234	0.0313333
279				0.49367	0.484657				0.035614	0.0312281
280				0.494094	0.4859				0.0355351	0.0317485
281				0.495036	0.486167				0.0357368	0.0315673
282				0.495483	0.487049				0.0358216	0.0314386
283				0.496299	0.487224				0.0355468	0.0316901
284				0.496473	0.488553				0.0358889	0.0323596
285				0.497507	0.488967				0.0363626	0.031807
286				0.498273	0.489382				0.0361345	0.032345
287				0.498957	0.490103				0.0363772	0.0322778
288				0.499578	0.490432				0.0362573	0.0320789
289				0.500428	0.491317				0.037231	0.0327105
290				0.500492	0.491826				0.0366111	0.0325263
291				0.501212	0.492185				0.0367164	0.0328187
292				0.502141	0.493229				0.0370789	0.0325643
293				0.502507	0.493316				0.0368918	0.0329971
294				0.50318	0.494225				0.0370585	0.0327135
295				0.503889	0.494689				0.0372865	0.0332515
296				0.504421	0.494811				0.0377368	0.0332632
297				0.50509	0.495988				0.0373275	0.0333713
298				0.505936	0.496685				0.0374386	0.0331491
299				0.506117	0.497247				0.0375	0.0329415
300				0.507106	0.497476				0.0377515	0.0334766
301				0.507301	0.498945				0.0380175	0.0336374
302				0.508057	0.499224				0.037652	0.033617
303				0.508197	0.500335				0.0382339	0.0339211
304				0.509603	0.501052				0.0383392	0.0338129
305				0.510091	0.501005				0.0385409	0.0340497
306				0.510494	0.501811				0.0385994	0.0340585
307				0.511091	0.501958				0.0384591	0.0340994
308				0.511959	0.502942				0.0385058	0.034307
309				0.51248	0.503221				0.0386374	0.0345439
310				0.512985	0.503752				0.0389825	0.0348041
311				0.513361	0.504103				0.0391316	0.0348099
312				0.514818	0.505319				0.0389971	0.0348801
313				0.514506	0.506029				0.039152	0.035038
314				0.515615	0.506454				0.039348	0.034652
315				0.515685	0.506631				0.0392076	0.0345877
316				0.516115	0.507928				0.0396491	0.0349532
317				0.517213	0.508106				0.0398129	0.0351784
318				0.517646	0.508511				0.0399269	0.0351754
319				0.518705	0.509453				0.0399444	0.0354795
320				0.519002	0.510191				0.0400146	0.0357924
321				0.519429	0.510599				0.0401111	0.0357485
322				0.520053	0.511209				0.0400994	0.036
323				0.520379	0.511427				0.0400058	0.0354649
324				0.520957	0.512088				0.0405906	0.0358918
325				0.521459	0.512591				0.0404503	0.0361199
326				0.52212	0.512988				0.0410351	0.0364386
327				0.523073	0.514009				0.0407982	0.0362105
328				0.523062	0.514884				0.0407193	0.0363772
329				0.524219	0.514839				0.0410526	0.0369444
330				0.524129	0.515705				0.0409942	0.0368187
331				0.524503	0.516073				0.0409678	0.0369064
332				0.525274	0.516544				0.041038	0.0368567
333				0.52626	0.517454				0.0414035	0.0368246
334				0.526714	0.51755				0.0415965	0.0369883
335				0.527526	0.51824				0.0419035	0.0367135
336				0.527792	0.518625				0.042076	0.0372105
337				0.52868	0.519354				0.0417982	0.037576
338				0.528549	0.519787				0.0414649	0.0373918
339				0.529403	0.520228				0.0421023	0.0371433
340				0.530177	0.52078				0.0425263	0.0376608
341				0.530656	0.521284				0.0423275	0.0375848
342				0.530683	0.522089				0.042652	0.0380351
343				0.531424	0.522644				0.0426345	0.0375526
344				0.531453	0.52345				0.0427368	0.0379123
345				0.532725	0.523918				0.0427456	0.0384181
346				0.532732	0.524636				0.0428626	0.0380965
347				0.533418	0.52528				0.0429678	0.037962
348				0.534175	0.52528				0.0430439	0.0379678
349				0.534889	0.525788				0.042807	0.0385
350				0.534948	0.526458				0.043383	0.0385614
351				0.535502	0.526744				0.0435673	0.0386287
352				0.535845	0.527507				0.0437661	0.0384942
353				0.536797	0.528386				0.0434708	0.0390146
354				0.537094	0.52839				0.0433187	0.0388012
355				0.537691	0.52906				0.0437427	0.0390058
356				0.538162	0.529528				0.0438918	0.0394357
357				0.539174	0.530018				0.0435906	0.039076
358				0.539347	0.530507				0.044152	0.039114
359				0.539538	0.530799				0.0440877	0.0398655
360				0.540454	0.531711				0.044462	0.0390906
361				0.540854	0.532199				0.0444327	0.0398567
362				0.541504	0.53229				0.0443363	0.0393889
363				0.541804	0.533289				0.0446754	0.0398421
364				0.542077	0.533691				0.0447456	0.0400614
365				0.542899	0.534063				0.0449883	0.0398509
366				0.54321	0.534058				0.0449269	0.0398801
367				0.543664	0.534825				0.0451988	0.0404649
368				0.544244	0.535523				0.0453655	0.0404064
369				0.544787	0.535576				0.0452018	0.0405263
370				0.545076	0.536545				0.045462	0.0406784
371				0.545635	0.537011				0.0458538	0.0405614
372				0.546373	0.537594				0.0459825	0.0405819
373				0.546486	0.537827				0.0457251	0.0403713
374				0.547332	0.538398				0.045924	0.0410965
375				0.547891	0.538894				0.0456316	0.0414152
376				0.547918	0.539482				0.0462251	0.0409181
377				0.548719	0.539805				0.0460468	0.0412222
378				0.549094	0.540462				0.0463713	0.0408129
379				0.549833	0.540623				0.0461959	0.0416988
380				0.55041	0.541216				0.0465497	0.0413392
381				0.55041	0.541463				0.0466345	0.0419298
382				0.550808	0.542249				0.0467105	0.0420556
383				0.551466	0.542737				0.0467661	0.0417982
384				0.551792	0.543314				0.047038	0.0420175
385				0.552531	0.543174				0.0470439	0.0420205
386				0.55305	0.543868				0.0469971	0.0420702
387				0.553346	0.544879				0.0473158	0.0421725
388				0.55365	0.545026				0.0472865	0.0421871
389				0.554815	0.545347				0.0474678	0.0423889
390				0.55462	0.546216				0.0476023	0.0426579
391				0.555214	0.546452				0.0476667	0.0428596
392				0.555771	0.547045				0.0476491	0.0426433
393				0.55616	0.547463				0.0481199	0.0427368
394				0.556767	0.547855				0.0479766	0.0426433
395				0.556986	0.548121				0.0481053	0.0430614
396				0.557737	0.548638				0.0480292	0.0432456
397				0.55786	0.549316				0.0483158	0.042962
398				0.558528	0.549828				0.0484737	0.0433246
399				0.558957	0.550221				0.0482895	0.0436696
400				0.559348	0.550327				0.048693	0.043614
401				0.559846	0.551018				0.0488655	0.0433889
402				0.560405	0.551411				0.0487661	0.0435643
403				0.560695	0.55179				0.0489123	0.0435409
404				0.56112	0.552414				0.0489649	0.0436491
405				0.561819	0.5529				0.0490702	0.0441111
406				0.562031	0.553473				0.0492544	0.0440292
407				0.562414	0.553651				0.0493713	0.0441257
408				0.562891	0.554022				0.0492573	0.0436842
409				0.563249	0.554691				0.0495234	0.0443363
410				0.564026	0.555252				0.0495965	0.0442018
411				0.564155	0.555726				0.0497515	0.0448509
412				0.564763	0.555967				0.0496404	0.0446023
413				0.565303	0.556406				0.0498392	0.0446988
414				0.565542	0.556748				0.0502164	0.0447427
415				0.565895	0.557225				0.0502105	0.0450789
416				0.566426	0.55757				0.050348	0.0450819
417				0.566974	0.558374				0.050155	0.0450731
418				0.567239	0.558408				0.0502515	0.0450965
419				0.56794	0.558911				0.0504942	0.0450322
420				0.568149	0.559419				0.0504503	0.0450088
421				0.568626	0.559784				0.0508246	0.0455965
422				0.569093	0.560184				0.050769	0.0454386
423				0.569323	0.560841				0.0509766	0.0456345
424				0.5699	0.561496				0.0508509	0.0458129
425				0.57031	0.561753				0.0511608	0.0457807
426				0.570571	0.562				0.0512515	0.0456959
427				0.571143	0.562219				0.0513626	0.0461754
428				0.571567	0.562811				0.0514678	0.046114
429				0.571879	0.563172				0.0515877	0.0460789
430				0.572306	0.563925				0.0517456	0.0464181
431				0.572748	0.564072				0.0517105	0.0462427
432				0.573261	0.564467				0.0519123	0.0467018
433				0.573624	0.564617				0.0518889	0.0466257
434				0.574045	0.565262				0.052076	0.0465526
435				0.574356	0.565852				0.0521725	0.0468187
436				0.574802	0.566264				0.0522661	0.0464444
437				0.575276	0.566736				0.0522749	0.046886
438				0.575612	0.567184				0.0524094	0.047117
439				0.576008	0.567297				0.0525175	0.0471345
440				0.576439	0.567655				0.0526316	0.0469971
441					0.568435					0.0471608
442					0.568499					0.0473041
443					0.56896					0.0473538
444					0.569401					0.0475556
445					0.570018					0.0476462
446					0.570243					0.0475088
447					0.570615					0.0476111
448					0.570895					0.0479181
449					0.571262					0.0479094
450					0.571803					0.0480526
451					0.572133					0.0480029
452					0.572519					0.0481637
453					0.573147					0.0483012
454					0.573405					0.0482982
455					0.573585					0.0488246
456					0.574247					0.048845
457					0.5746					0.0488801
458					0.574876					0.0489269
459					0.575093					0.0487924
460					0.575741					0.0489444
461					0.576005					0.0491257
462					0.576594					0.0490439
463					0.576965					0.0494503
464					0.577373					0.0493041
465					0.577565					0.0496257
466					0.578101					0.0492924
467					0.578286					0.0495673
468					0.578796					0.0497661
469					0.579321					0.0499386
470					0.579303					0.0498509
471					0.579912					0.0499064
472					0.580485					0.0500439
473					0.58063					0.0500673
474					0.581					0.050231
475					0.581387					0.0504503
476					0.581722					0.0506871
477					0.582247					0.0506754
478					0.582456					0.0505877
479					0.582848					0.0506404
480					0.583297					0.0506345
481					0.583697					0.0509035
482					0.583877					0.0508099
483					0.584437					0.0510263
484					0.584691					0.0511199
485					0.585049					0.0512047
486					0.585333					0.051345
487					0.585811					0.0513421
488					0.58615					0.0514357
489					0.586652					0.0515263
490					0.586902					0.0516491
491					0.58726					0.0517368
492					0.587689					0.0519123
493					0.587891					0.0519737
494					0.588261					0.052038
495					0.588726					0.0520351
496					0.58907					0.052155
497					0.589402					0.0522924
498					0.589758					0.0523187
499					0.590112					0.0525
500					0.590443					0.0525146
501					0.590827					0.0526316
